# Supplementary material
Source: PubMed Central journal article supplement (PMC3773792)
Supplement: 1309139110_pnas.201309139SI.pdf [file 1309139110_pnas.201309139SI.pdf]

# Supporting Information

Renaud et al. 10.1073/pnas.1309139110

## SI Text

### Stochastic Surrogate Hamiltonian Model for Short DNA Hairpins

Following the stochastic surrogate Hamiltonian (SSH) approach, the simulation of the charge transfer is performed solving the Liouville equation for the full density matrix,  $\rho(t)$ :

$$\frac{d\rho(t)}{dt} = \frac{-i}{\hbar} [\mathcal{H}_S + \mathcal{H}_B + \mathcal{H}_{SB}; \rho(t)], \quad [\text{S1}]$$

where  $\mathcal{H}_S$  is the Hamiltonian modeling the hairpin,  $\mathcal{H}_B$  is the Hamiltonian of the bath formed by the intramolecular vibration modes of the individual molecule in the hairpin, and  $\mathcal{H}_{SB}$  is the interaction Hamiltonian between the propagating hole and the bath. Following our previous study (1), the Hamiltonian of the system reads:

$$\begin{aligned} \mathcal{H}_S = & E_{S_a} |S_a\rangle\langle S_a| + \sum_{i=1}^N E_i |B_i\rangle\langle B_i| + E_{S_b^*} |S_b^*\rangle\langle S_b^*| \\ & + \sum_{i=1}^N (E_i - E_t) |t_i\rangle\langle t_i| + E_{S_b} |S_b\rangle\langle S_b| \\ & + c_a |S_a\rangle\langle B_1| + c_b |B_N\rangle\langle S_b^*| \\ & + \sum_{i=1}^{N-1} \alpha_{i,i+1} |B_i\rangle\langle B_{i+1}| \\ & + h.c.. \end{aligned} \quad [\text{S2}]$$

In this Hamiltonian,  $E_{S_a}$  is the energy of the excited state,  $|S_a\rangle$ , of the hole donor. Similarly,  $E_{S_b^*}$  is the on-site energy of the excited state,  $|S_b^*\rangle$ , of the hole acceptor. The values of these two energies is set as the reference (i.e.,  $E_{S_a} = E_{S_b^*} = 0$ ). In our model,  $E_i$  is the on-site energy of the state  $|B_i\rangle$  representing the  $i$ th base pair in the hairpin. The value of this energy is defined following a Weller-like equation:

$$E_n = \text{IP}_{B_n} - E_{h\nu} - \text{EA}_{S_a} + E_c (S_a^- / B_n^+) - \Delta E_{\text{sol}}, \quad [\text{S3}]$$

where  $\text{IP}_{B_n}$  is the ionization potential (IP) of the  $n$ th base pair,  $\text{EA}_{S_a} = 1.08$  eV is the electron affinity of the hole donor (2), and  $E_{h\nu} = 3.35$  eV is the excitation energy of the stilbene donor (3).  $E_c (S_a^- / B_n^+)$  is the Coulomb attraction between the electron excess located on  $S_a$  and the propagating hole, and  $\Delta E_{\text{sol}} = 0.2$  eV is the solvation energy (2). The only difference between an A:T base pair and a G:C base pair in our model is therefore the IP of the corresponding site. It is commonly accepted that the IP of the guanine molecule is  $\sim 0.5$  eV lower than the IP of the adenine molecule (4, 5), which partially explains the high conductance of hairpin presenting a high concentration of G:C base pairs. Hence the IP of adenine and guanine are respectively fixed to  $\text{IP}_A = 7.35$  eV and  $\text{IP}_G = 6.86$  eV. Finally, the energy,  $E_{S_b}$ , of the ground state of the anionic form of the hole acceptor,  $|S_b\rangle$ , is set to  $-0.25$  eV (1).

The states mentioned above are all coupled with each other to enable the hole to transfer from one base pair to another. All these couplings have been evaluated via density functional theory calculations by Grozema et al. (2, 6). The coupling  $c_a$  between the hole donor and the first base pair is equal to  $5(-4)$  meV if the first base pair is A:T(G:C). Similarly, the coupling between the last base pair and the hole acceptor is set to  $25(80)$  meV if the last base

pair is A:T(G:C). Finally, the coupling  $\alpha_{i,i+1}$  is set to 50 meV between two A:T base pairs and to  $-4$  meV between an A:T base pair and a G:C base pair.

The geometry relaxation of individual base pairs upon charging tends to localize the propagating hole. To simulate such localization, trap states, labeled  $|t_i\rangle$ , are introduced in our model. The intramolecular energy relaxation, labeled  $E_t$ , was estimated by comparing the vertical and adiabatic IP of the base pairs, leading to a value of  $\sim 0.15$  eV (1).

In the SSH approach, the bath is defined as series of two-level systems, or quantum modes, and its Hamiltonian reads:

$$\mathcal{H}_B = \sum_{i=1}^M \hbar \omega_i \sigma_i^\dagger \sigma_i, \quad [\text{S4}]$$

where  $\omega_i$  is the frequency of the  $i$ th mode and  $\sigma_i^\dagger (\sigma_i)$  is the creation (annihilation) operator. The value of the mode frequencies,  $\omega_i$ , was chosen to fit the intramolecular vibrations modes of the isolated base pairs using a super-ohmic distribution (7, 8):

$$\mathcal{J}(\omega) = \lambda (\omega / \omega_c)^2 e^{-(\omega / \omega_c)^2}, \quad [\text{S5}]$$

with the cutoff frequency,  $\omega_c$ , set at  $\omega_c = 0.15$  eV. The reorganization energy,  $\lambda$ , was set to  $\lambda = 100$  meV, which is a typical value of hole-phonon interaction strength in the adenine and guanine molecules (9). Finally, the interaction Hamiltonian between the propagating hole on the hairpin and the bath formed by intramolecular vibration modes is given by:

$$\mathcal{H}_{SB} = \mathcal{R}_S \otimes \sum_{i=1}^M \frac{\mathcal{J}(\omega_i)}{\sqrt{M}} (\sigma_i^\dagger + \sigma_i), \quad [\text{S6}]$$

where  $\mathcal{R}_S$  is the dimensionless relaxation pathway matrix and  $\mathcal{J}(\omega_i)$  is the spectral density of the hole-phonon coupling constant (unit of energy), evaluated at the bath-mode frequency  $\omega_i$ . The  $1/\sqrt{M}$  term was introduced for our simulation to converge when increasing the number of bath modes,  $M$ , explicitly incorporated in our calculations. The relaxation matrix accounts for the trapping on the base pairs as well as the final trapping on hole acceptor, and consequently reads:

$$\mathcal{R}_S = \left( |S_b^*\rangle\langle S_b| + \sum_{i=1}^N |B_i\rangle\langle t_i| + h.c. \right). \quad [\text{S7}]$$

The initial state of the evolution was set as a product state:  $\rho(0) = \rho_S(0) \otimes \rho_B(T)$ , where  $\rho_S(0) = |S_a\rangle\langle S_a|$  and  $\rho_B(T)$  represent the thermal state of the bath. This initial state can lead to non-physical results when accounting explicitly for the excitation pulse because it ignores the inherent system/bath entanglement. However, it is acceptable in our case because the evolution directly starts from the excited state of the hole donor (i.e., after the excitation pulse, where the initial system/bath entanglement has been partially or totally destroyed). To limit the computational cost of the approach, only a small number of bath modes are explicitly incorporated in  $\mathcal{H}_B$ . To delay the recurrence time, the SSH approach uses quantum jumps in the bath manifold. Each of these jumps resets the state of a given bath mode to its thermal state, and consequently simulates the exchange of energy between the explicit bath and a larger unresolved environment.

Further details about the implementation of the SSH approach can be found in the study by Renaud et al. (1).

## Hole Dynamics

**Hole Migration Along  $GA$ .** Fig. S14 presents the evolution of the charge density along  $GA$ . Starting from the hole donor, the hole density is quickly transferred to the neighboring G:C base pair, where almost 80% of the hole density is localized after 2 ps. This important localization of the hole density on the first base pair was also observed in poly(A)-poly(T) hairpins (1). This initial localization on the first base pair of the sequence is here reinforced by the low IP of the G:C base pair. Despite this important initial localization, the hole density slowly propagates onto the neighboring A:T base pair, from which it can finally reach the hole acceptor. However, due to the important localization on the G:C base pair, the transfer rate to  $S_b$  is inefficient; only less than 10% of the hole density has reached the acceptor after 25 ps, and only less than 20% has reached the acceptor after 100 ps (Fig. S34).

**Hole Migration Along  $AG$ .** Fig. S1B presents the hole propagation along hairpin  $AG$ . These dynamics present radically different characteristics than the one obtained along  $GA$ . Initially localized on  $S_a$ , the hole density is rapidly transferred onto the neighboring A:T base pair. However, a maximum of only 50% of the hole density is localized on this base pair after 1 ps against 80% for hairpin  $GA$ . This weaker localization is mainly due to the rapid transfer that occurs between the two base pairs allowed by their small energy difference. When the G:C is located after the A:T base pair, the difference in their IP compensates for the Coulomb energy term in Eq. S3. This gives an energy difference of only 0.3 eV between the two base pairs. With such a small energy gap to overcome, the charge is quickly transferred to the second base pair, where almost 40% of the hole density is localized after 2 ps. Due to its low IP, the energy difference between the G:C base pair located at the end of the hairpin and the hole acceptor is also reduced compared with the previous case, which speeds up the last transfer step. As a result, the overall transfer is much more efficient than in hairpin  $GA$ , and more than 50% of the hole density has already crossed the hairpin and reaches the hole acceptor after 25 ps. As seen in Fig. S3A, the hole density localized on  $S_b$  saturates to 61% after about 100 ps.

**Hole Dynamics Along  $GA_5$ .** Fig. S24 presents the hole dynamics along hairpin  $GA_5$ , together with the site energies of the base pairs along this sequence. The hole is initially localized on the donor site  $S_a$  and is transferred to the neighboring G base, where almost 75% of the hole population is localized after 2 ps. As seen in Fig. S24, the energy difference between the first and second base pairs is equal to 1.3 eV. This large energy difference significantly slows down the process of hole migration such that more than 50% of the hole population is still localized on the first G:C base pair after 10 ps. Hence, the G:C base pair in the  $GA_5$  sequence can be considered as an efficient trap for the hole density. Nevertheless, there exists a certain probability that a hole will escape localization on the G:C site and will slowly propagate along the hairpin. However, after 25 ps, only 10% of the hole density has reached the last base pair and less than 0.1% of the hole density is localized on the hole acceptor (Fig. S3B). Even after 100 ps, only 1% of the hole density is localized on  $S_b$ .

**Hole Dynamics Along  $A_5G$ .** Fig. S2B presents the hole dynamics involved in hairpin  $A_5G$ , together with the site energies of the base pairs along this sequence. Similar to the  $GA_5$  hairpin, the hole undergoes a fast transfer from  $S_a$  to the first A:T base pair. The site energy of this base pair is 0.5 eV larger than that of the G:C pair in  $GA_5$  (compare with energy diagrams in Fig. S2A and B). For this reason, the hole localization on the first base pair is less effective for  $A_5G$  than for  $GA_5$ . As a result, in the case of the

$A_5G$  sequence, only 60% of the hole population is localized on the first A:T base pair after 2 ps. It is worth mentioning that the energy difference between the first two base pairs is smaller for  $A_5G$  (0.8 eV) than for  $GA_5$  (1.3 eV). This allows a faster hole transfer from the first base pair to the rest of the hairpin. Therefore, after 25 ps, 20% of the charge population has reached the last G:C base pair and 0.25% of the hole density is localized on the hole acceptor (Fig. S3B). Even after 100 ps, only 2.5% of the hole density is localized on  $S_b$ .

## Determination of $k_a$ and $\Phi_a$

The values of the charge separation quantum yield ( $\Phi_a$ ) and arrival rate ( $k_a$ ) can be obtained by fitting the population of the hole acceptor site by the function:

$$\text{Tr}[\rho(t)P_{S_b}] = \Phi_a \left(1 - e^{-(k_a t)^\chi}\right), \quad [\text{S8}]$$

where  $P_{S_b} = |S_b^*\rangle\langle S_b^*| + |S_b\rangle\langle S_b|$  is the projector on the  $S_b$  site. The values of  $k_a$ ,  $\Phi_a$ , and  $\chi$  deduced from this fitting procedure for all the sequences studied in this article are listed in Table S1. The values of  $k_a$  and  $\Phi_a$  obtained for hairpins  $A_2GA_3$  and  $A_3GA_2$  were the same, and only the latter are reported in Table S1. A stretched exponential parameter,  $\chi = 1.1 - 1.3$ , was necessary to obtain a satisfying fit for hairpins containing three to six base pairs. In such systems, the hole density is first transferred from  $S_a$  to the base pair stack before reaching the hole acceptor. Such sequential transfer induces a delay in the rise of the  $S_b$  population. This stretched exponential behavior is clearly visible in Fig. S3B. Note that our data only cover times up to 100 ps. As seen in Fig. S3B, this evolution time is not long enough to reach saturation of the  $S_b$  population for most hairpins. Hence, the fidelity of our fits may deteriorate for longer times. A stretched exponential,  $\chi < 1$ , was also necessary for short hairpins containing one to two base pairs. This deviation from the simple exponential is due to the competition between direct superexchange from  $S_a$  to  $S_b$  and sequential hopping via the base pairs. Consequently, fitting our data with a biexponential rise may be more suitable.

## Fit of the Arrival Rate Distance Dependence

The variation of  $k_a$  with the distance,  $R$ , between  $S_a$  and  $S_b$  obtained for the different series represented in Fig. 1 can all be fitted by the equation:

$$k_a(R) = \kappa_1 e^{-\beta(N+1)R_0} + \kappa_2 (N+1)^{-\eta}, \quad [\text{S9}]$$

The first term of Eq. S9 corresponds to a superexchange mechanism that gives rise to an exponential decay of the arrival rate with a falloff parameter  $\beta$ . The second term corresponds to the incoherent regime characterized by a power law of exponent  $\eta$ . Finally,  $\kappa_1$  and  $\kappa_2$  are the scaling factors of these two mechanisms. The values of these parameters obtained for our calculations are shown in Table S2. As seen in this table,  $\beta$  is sensitive to the sequence of the hairpin and goes from  $0.85 \text{ \AA}^{-1}$  for the  $A_n$  series to  $0.55 \text{ \AA}^{-1}$  for the  $A_nG$  series. This decrease of  $\beta$  is due to the lower energy barrier the hole has to overcome to cross hairpins containing a G:C base pair thanks to the low IP of G bases. The value of  $\eta$  is insensitive to the sequence and remains around  $\eta = 2$ . This value is typical of unbiased incoherent hopping. The value of  $\kappa_1$  is also insensitive to the sequence. On the contrary,  $\kappa_2$  varies significantly with the composition of the hairpins and goes from  $1.6 \text{ ns}^{-1}$  for the  $A_n$  series to  $20 \text{ ns}^{-1}$  for the  $A_nG$  series.

## Degree of Delocalization and Participation Ratio

The hole transfer mechanism along sequences containing a single G:C base pair is usually described in terms of two sequential hopping steps: the first one from the hole donor to the G:C base pair and the second one from the G:C base pair to the hole acceptor

(10). This argument supposes a very weak population of the A:T base pairs during the transport, which implies a superexchange type of mechanism for this two elementary hopping steps.

To verify if our results match this sequential tunneling model, one can compute the degree of localization of the hole density following:

$$\mathcal{L} = \frac{1}{T} \int_0^T \sum_n \left( \text{Tr}[\rho(t)P_n] \right)^2 dt, \quad [\text{S10}]$$

where  $P_n$  is the projector on the  $n$ th site and the index  $n$  runs over the hole donor, the different base pairs, and the hole acceptor. If the hole is completely localized on a given base pair at time  $t$ , the quantity  $\sum_n (\text{Tr}[\rho(t)P_n])^2$  equals 1 and falls down to  $1/N$  when the hole is delocalized over  $N$  different sites. In Eq. S10,  $\mathcal{L}$  depends on the time-averaging value  $T$ . We pose here  $T = 5$  ps so that  $\mathcal{L}$  will not be dominated by the slow propagation of the hole density from the base pair to the hole acceptor. The corresponding values are reported in Table S3 for different sequences containing six base pairs each. These values remain quite low for all sequences, indicating a strong delocalization of the hole density along the hairpin. This important delocalization is illustrated in Fig. 3. To grasp the impact of guanine on the hole propagation, one can compute the change in  $\mathcal{L}$ , noted as  $\Delta\mathcal{L}$ , induced by the introduction of a G:C base pair at a given site. These values, reported in Table S3, show that substituting the first A:T with a G:C base pair increases the degree of localization by 39%. This increase of  $\mathcal{L}$  is due to the efficient trapping of the hole density on the G:C base pair seen in Fig. S1A. On the contrary, performing the A:T/G:C substitution at the second site decreases  $\mathcal{L}$  by 13%. This decrease of  $\mathcal{L}$  here is due to the rapid charge transfer between the first and second base pairs that occurs in that case, as seen in Fig. S1B. However, introducing a G:C base pair in third position or further away from  $S_a$  does not significantly modify the degree of localization.

The degree of localization of the hole density on the G:C base pair can be also evaluated from the participation ratio of the G:C base pair given by:

$$\mathcal{R}_G = \frac{1}{T} \int_0^T \frac{\text{Tr}[\rho(t)P_G]}{\sum_n \text{Tr}[\rho(t)P_n]}, \quad [\text{S11}]$$

where  $P_G$  is the projector on the G:C base pair and the index  $n$  runs over all the base pairs  $S_a$  and  $S_b$ , and  $T = 5$  ps (see previous section). The corresponding values of  $\mathcal{R}_G$  are reported in Table S3 for different sequences containing six base pairs. The larger participation ratio is obtained when the G:C base pair is in first position due to the strong localization of the hole density observed in that case. Shifting the position of the G:C base pair toward the end of the sequence decreases  $\mathcal{R}_G$ . One can also compare the values of  $\mathcal{R}_G$  with the participation ratio of an A:T base pair at the same position in hairpin  $A_6$ . The corresponding values, noted  $\Delta\mathcal{R}_G$ , are reported in Table S3. The larger modification is obtained when the G:C base pair is in the second position. In  $A_6$ , the transfer from  $S_a$  to the first base pair is fast but the subsequent transfer from the first base pair to the second base pair is much slower due to the large energy difference between these two sites. In  $AGA_4$ , a small energy difference is obtained between the first A:T base pair and the G:C base pair, which leads to a rapid transfer from  $S_a$  to these two base pairs.

Our results show that according to our simulations, the G:C base pair does not act as an intermediary residing site where the hole density localizes during its propagation. Much like in the case of poly(A)-poly(T) sequences (1), the hole density is delocalized along the entire hairpin and only partially occupies the G:C base

pair. The participation ratio of the G:C base pair depends on its position along the hairpin and, of course, the length of the sequence. However, the G:C base pair is never fully populated. As mentioned in the main text, our model ignores the solvent reorganization that could induce a strong localization of the propagating charge.

### Nearest Neighbor Transfer Rates

The computation of the nearest neighbor transfer rate,  $k_{n,n+1}$ , between the  $n$ th and  $(n+1)$ th base pairs relies on the evaluation of the transfer rates,  $k_n$  and  $k_{n+1}$ , from  $S_a$  to each of these sites (1). The values of  $k_n$  and  $k_{n+1}$  can be obtained by fitting the temporal evolution of the hole population on the  $n$ th and  $(n+1)$ th sites with a rising exponential function (1). Once these two kinetic parameters are evaluated, the transfer rate  $k_{n,n+1}$  is computed following the method of Renaud et al. (1):

$$k_{n,n+1} = \frac{k_n k_{n+1}}{k_n - k_{n+1}}. \quad [\text{S12}]$$

Note that the final transfer rate,  $k_f$ , from the last base pair to the acceptor  $S_b$  can also be computed following Eq. S12. However, in this case,  $k_{n+1}$  should be replaced by the arrival rate  $k_a$ . The values of the nearest neighbor transfer rates calculated for hairpin  $A_6$  and for three different sequences containing a single G:C are reported in Table S4. The results listed in this table show that the nearest neighbor transfer rates obtained for  $A_6$  continuously increase along the hairpin due to the progressive reduction of the energy difference between neighboring pairs (1). In addition, the large energy difference between the last A:T pair and the hole acceptor leads to a value of  $k_f$  that is three orders of magnitude smaller than the average rate of hole transfer between neighboring base pairs. Therefore, this last transfer step is the limiting step of the entire hole propagation along hairpin  $A_6$ . Examination of Table S4 reveals that this conclusion is also valid for the other sequences studied in this article. Note that  $k_f$  is one order of magnitude larger for  $A_5G$  than for  $A_6$ . This significant increase of the final transfer rate can be attributed to the low IP of the guanine base. A lower IP leads to a smaller energy difference between the last base and the hole acceptor in  $A_5G$  than in  $A_6$ , thus increasing the transfer rate. For this reason, difference in  $k_a$  values obtained for hairpins  $A_5G$  and  $A_6$  can mainly be attributed to changes in the rate of the last transfer step only.

As can be seen from Table S4, the forward hole transfer rate from a G:C base pair to its neighboring A:T base pair at a given position along the sequence is always slower than the transfer rate at the same position in  $A_6$  (values marked in red in Table S4). On the contrary, the forward transfer rate from an A:T base pair to the following G:C base pair can be either larger or smaller than the transfer rate at the same position in  $A_6$  (values marked in blue in Table S4). To understand this result, it is useful to recognize that due to the electrostatic interaction between the moving hole and  $S_a^-$ , the energy of the  $n$ th site is smaller than the energy of the  $(n+1)$ th site. Substituting the  $n$ th A:T base pair for a G:C base pair increases this energy difference, and consequently reduces the transfer rate  $k_{n,n+1}$ . Another situation arises when replacing the  $(n+1)$ th A:T base pair with a G:C base pair. This substitution can either decrease or increase the energy difference between the two neighboring base pairs depending on their location in the sequence. This, in turn, will make the value of the rate for hole transfer between these adjacent pairs either greater or smaller.

### Delocalized Conduction Channels

As mentioned in the main text, the delocalized conduction channels (DCCs) appear after a bloc-diagonalization of the hairpins Hamiltonian. Ignoring the dynamical disorder, the static Hamiltonian describing the hole propagation on the hairpin reads:









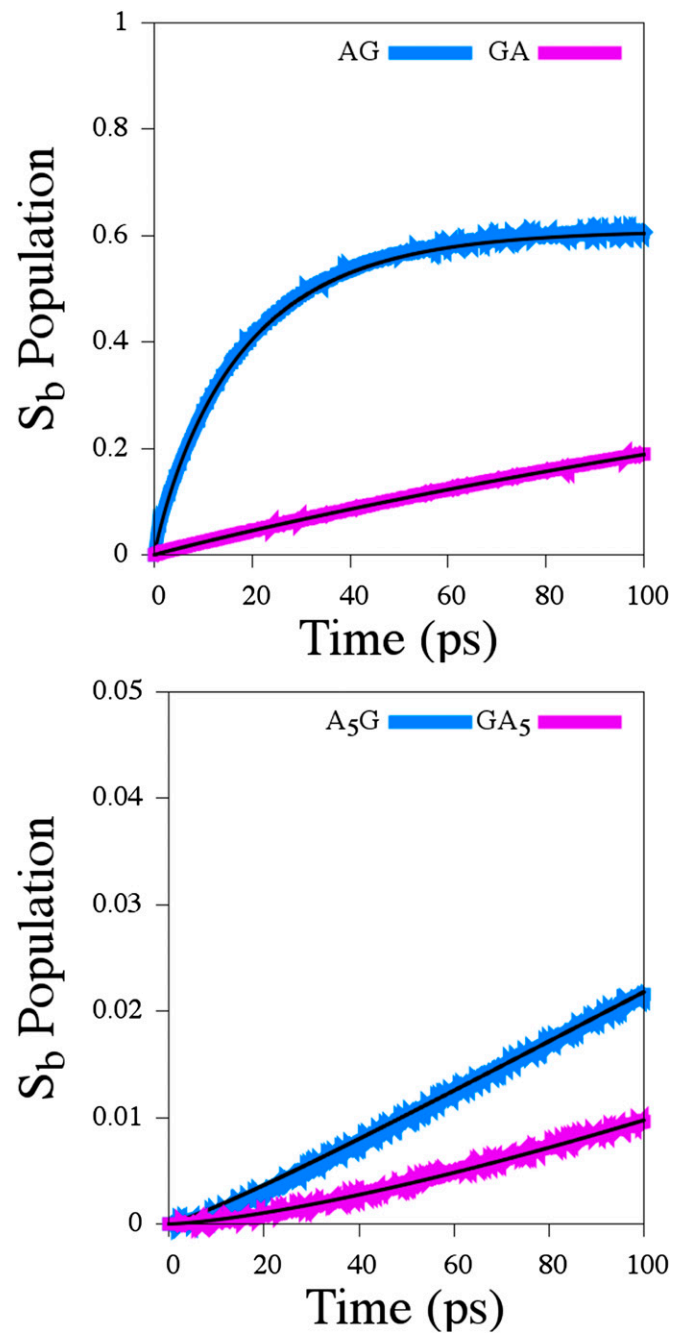

**Fig. S3.** Fit of the time-dependent evolution of hole density localized on  $S_b$  for AG and GA (Upper) and A<sub>5</sub>G and GA<sub>5</sub> (Lower). Note the deviation from simple exponential for the long hairpins.

**Table S1. Theoretical values of the arrival rate ( $k_a$ ) and the charge separation quantum yield ( $\Phi_a$ ) obtained for all the sequences shown in Fig. 1**

| Sequence         | $k_a$ , ns <sup>-1</sup> | $\Phi_a$ | $\chi$ | Sequence          | $k_a$ , ns <sup>-1</sup> | $\Phi_a$ | $\chi$ | Sequence                       | $k_a$ , ns <sup>-1</sup> | $\Phi_a$ | $\chi$ |
|------------------|--------------------------|----------|--------|-------------------|--------------------------|----------|--------|--------------------------------|--------------------------|----------|--------|
| A <sub>1</sub>   | 186.20                   | 0.78     | 0.6    |                   |                          |          |        |                                |                          |          |        |
| A <sub>2</sub>   | 10.00                    | 0.45     | 1.0    | GA                | 11.5                     | 0.27     | 1.1    | AG                             | 54.95                    | 0.61     | 0.8    |
| A <sub>3</sub>   | 1.69                     | 0.10     | 1.1    | GA <sub>2</sub>   | 2.69                     | 0.18     | 1.3    | A <sub>2</sub> G               | 10.23                    | 0.15     | 1.3    |
| A <sub>4</sub>   | 1.07                     | 0.09     | 1.1    | GA <sub>3</sub>   | 1.99                     | 0.19     | 1.3    | A <sub>3</sub> G               | 5.49                     | 0.13     | 1.2    |
| A <sub>5</sub>   | 0.69                     | 0.09     | 1.2    | GA <sub>4</sub>   | 1.14                     | 0.15     | 1.2    | A <sub>4</sub> G               | 3.01                     | 0.14     | 1.1    |
| A <sub>6</sub>   | 0.54                     | 0.06     | 1.2    | GA <sub>5</sub>   | 0.81                     | 0.18     | 1.3    | A <sub>5</sub> G               | 2.04                     | 0.09     | 1.1    |
| AGA              | 4.78                     | 0.12     | 1.1    |                   |                          |          |        |                                |                          |          |        |
| AGA <sub>2</sub> | 2.08                     | 0.11     | 1.2    | A <sub>2</sub> GA | 2.29                     | 0.13     | 1.1    |                                |                          |          |        |
| AGA <sub>3</sub> | 1.34                     | 0.10     | 1.2    | A <sub>3</sub> GA | 1.54                     | 0.10     | 1.2    | A <sub>2</sub> GA <sub>2</sub> | 1.81                     | 0.10     | 1.2    |
| AGA <sub>4</sub> | 0.93                     | 0.10     | 1.2    | A <sub>4</sub> GA | 0.97                     | 0.09     | 1.2    | A <sub>3</sub> GA <sub>2</sub> | 0.95                     | 0.09     | 1.2    |

**Table S2. Scaling factors and falloff parameters for the arrival rate distance dependence given in Eq. S9**

| Sequence         | $\kappa_1$ , ps <sup>-1</sup> | $\beta$ , Å <sup>-1</sup> | $\kappa_2$ , ns <sup>-1</sup> | $\eta$ |
|------------------|-------------------------------|---------------------------|-------------------------------|--------|
| A <sub>n</sub>   | 8.00                          | 0.85                      | 1.60                          | 2.0    |
| GA <sub>n</sub>  | 2.50                          | 0.75                      | 8.00                          | 2.0    |
| AGA <sub>n</sub> | 1.05                          | 0.55                      | 9.00                          | 1.9    |
| A <sub>n</sub> G | 3.00                          | 0.55                      | 20.00                         | 2.0    |

**Table S3. Degree of localization of the hole density ( $\mathcal{L}$ ) and participation ratio of the G base ( $\mathcal{R}_G$ ) (details are provided in SI Text)**

| Sequence                       | $\mathcal{L}$ | $\Delta\mathcal{L}$ | $\mathcal{R}_G$ | $\Delta\mathcal{R}_G$ |
|--------------------------------|---------------|---------------------|-----------------|-----------------------|
| A <sub>6</sub>                 | 0.23          | —                   | —               | —                     |
| GA <sub>5</sub>                | 0.32          | +39%                | 0.51            | +55%                  |
| AGA <sub>4</sub>               | 0.20          | -13%                | 0.27            | +80%                  |
| A <sub>2</sub> GA <sub>3</sub> | 0.24          | —                   | 0.15            | +36%                  |
| A <sub>3</sub> GA <sub>2</sub> | 0.23          | —                   | 0.11            | +23%                  |
| A <sub>4</sub> GA              | 0.24          | —                   | 0.10            | +17%                  |
| A <sub>5</sub> G               | 0.23          | —                   | 0.09            | +11%                  |

**Table S4. Transfer rates between neighboring base pairs for different sequences ( $k_{i \rightarrow j}$ ) and final transfer rate between the last base pair and the hole acceptor ( $k_f$ )**

| Rate                  | A <sub>6</sub> | G <sub>6</sub> | GA <sub>5</sub> | AGA <sub>4</sub> | A <sub>2</sub> GA <sub>3</sub> | A <sub>3</sub> GA <sub>2</sub> | A <sub>4</sub> GA | A <sub>5</sub> G | Units            |
|-----------------------|----------------|----------------|-----------------|------------------|--------------------------------|--------------------------------|-------------------|------------------|------------------|
| $k_{1 \rightarrow 2}$ | 0.31           | 0.32           | 0.06            | 5.40             | 0.46                           | 0.38                           | 0.36              | 0.29             |                  |
| $k_{2 \rightarrow 3}$ | 0.29           | 0.31           | 0.29            | 0.09             | 3.81                           | 0.37                           | 0.26              | 0.30             |                  |
| $k_{3 \rightarrow 4}$ | 1.11           | 1.10           | 3.31            | 0.99             | 0.08                           | 1.74                           | 1.09              | 0.99             | ps <sup>-1</sup> |
| $k_{4 \rightarrow 5}$ | 2.02           | 2.83           | 2.42            | 3.31             | 4.45                           | 0.16                           | 1.13              | 2.59             |                  |
| $k_{5 \rightarrow 6}$ | 7.05           | 25.9           | 1.31            | 3.06             | 2.29                           | 5.08                           | 0.31              | 1.35             |                  |
| $k_f$                 | 0.23           | 1.96           | 0.84            | 0.96             | 0.99                           | 1.00                           | 0.99              | 2.10             | ns <sup>-1</sup> |



**Table S5.** Couplings  $V_{an}$  and  $V_{bn}$  (meV), energies  $\epsilon_n$  (eV), and transfer rate  $k_n$  ( $\text{ns}^{-1}$ ) for each DCC ( $\phi_n$ ) of different sequences

| $\phi_n$ | $A_6$     |              |           |           | $GA_5$    |              |           |           | $A_2GA_3$ |              |           |           | $A_5G$    |              |           |           |
|----------|-----------|--------------|-----------|-----------|-----------|--------------|-----------|-----------|-----------|--------------|-----------|-----------|-----------|--------------|-----------|-----------|
|          | $V_{an}$  | $\epsilon_n$ | $V_{bn}$  | $k_n$     |
| $n = 1$  | 4.99      | 0.19         | $10^{-6}$ | $10^{-4}$ | 4.99      | -0.69        | $10^{-7}$ | $10^{-4}$ | 4.98      | 0.19         | $10^{-6}$ | $10^{-3}$ | 4.99      | 0.19         | $10^{-5}$ | $10^{-4}$ |
| $n = 2$  | 0.31      | 0.99         | $10^{-3}$ | $10^{-3}$ | 0.01      | 0.99         | $10^{-3}$ | 0.01      | 0.17      | 0.88         | $10^{-3}$ | 0.02      | 0.31      | 0.99         | 0.01      | 0.09      |
| $n = 3$  | 0.02      | 1.39         | 0.23      | 0.05      | $10^{-3}$ | 1.39         | 0.23      | 0.05      | 0.26      | 1.02         | $10^{-3}$ | 0.04      | 0.02      | 1.39         | 8.02      | 0.47      |
| $n = 4$  | $10^{-3}$ | 1.64         | 5.47      | 0.09      | $10^{-4}$ | 1.64         | 5.47      | 0.10      | $10^{-5}$ | 1.63         | 5.10      | 0.11      | $10^{-3}$ | 1.42         | 98.6      | 0.52      |
| $n = 5$  | $10^{-4}$ | 1.79         | 33.7      | 0.06      | $10^{-5}$ | 1.79         | 33.7      | 0.08      | $10^{-6}$ | 1.79         | 33.7      | 0.13      | $10^{-3}$ | 1.64         | 8.56      | 0.16      |
| $n = 6$  | $10^{-5}$ | 1.94         | 93.9      | 0.01      | $10^{-6}$ | 1.94         | 93.9      | 0.02      | $10^{-6}$ | 1.94         | 93.9      | 0.04      | $10^{-4}$ | 1.82         | 11.79     | 0.02      |
